# Supplementary material
Source: PubMed Central journal article supplement (PMC6858793)
Supplement: NIHMS1059094-supplement-Supporting_Information.pdf [file NIHMS1059094-supplement-Supporting_Information.pdf]

**A**

|                              |                                                               |     |
|------------------------------|---------------------------------------------------------------|-----|
| RAK16_fungus_ITS             | CTGAGTGAGGGCCCCTCGGGGTCCAACCTCCCACCCGTGTTTAAACGAACCTTGTTGCTTT | 60  |
| <i>P. aurantiacobrunneum</i> | CTGAGTGAGGGCCCCTCGGGGTCCAACCTCCCACCCGTGTTTAAACGAACCTTGTTGCTTT | 60  |
| RAK16_fungus_ITS             | GGCGGGCCCCGCTCACGGCCGCCGGGGGGCATCTGCCCCGGGCCCGCGCCCGCGAAGC    | 120 |
| <i>P. aurantiacobrunneum</i> | GGCGGGCCCCGCTCACGGCCGCCGGGGGGCATCTGCCCCGGGCCCGCGCCCGCGAAGC    | 120 |
| RAK16_fungus_ITS             | CACCTGTGAACTCTGTCTGAAGTATGCAGTCTGAGACAATTATTAATAATTAATAAACTT  | 180 |
| <i>P. aurantiacobrunneum</i> | CACCTGTGAACTCTGTCTGAAGTATGCAGTCTGAGACAATTATTAATAATTAATAAACTT  | 180 |
| RAK16_fungus_ITS             | TCAACAACGGATCTCTTGGTTCCGGCATCGATGAAGAACGCAGCGAAATGCGATAACTAA  | 240 |
| <i>P. aurantiacobrunneum</i> | TCAACAACGGATCTCTTGGTTCCGGCATCGATGAAGAACGCAGCGAAATGCGATAACTAA  | 240 |
| RAK16_fungus_ITS             | TGTGAATTGCAGAATTCAGTGAATCATCGAGTCTTTGAACGCACATTGCGCCCTCTGGTA  | 300 |
| <i>P. aurantiacobrunneum</i> | TGTGAATTGCAGAATTCAGTGAATCATCGAGTCTTTGAACGCACATTGCGCCCTCTGGTA  | 300 |
| RAK16_fungus_ITS             | TTCCGGAGGGCATGCCTGTCCGAGCGTCATTGCTGCCCTCCAGCCCGGCTGGTGTGTTGG  | 360 |
| <i>P. aurantiacobrunneum</i> | TTCCGGAGGGCATGCCTGTCCGAGCGTCATTGCTGCCCTCCAGCCCGGCTGGTGTGTTGG  | 360 |
| RAK16_fungus_ITS             | GCCCCGCCCCCTTCCCGGGGGGCGGGCCCGAAAGGCAGCGCGGCACCGCTCCGGTC      | 420 |
| <i>P. aurantiacobrunneum</i> | GCCCCGCCCCCTTCCCGGGGGGCGGGCCCGAAAGGCAGCGCGGCACCGCTCCGGTC      | 420 |
| RAK16_fungus_ITS             | CTCGAGCGTATGGGGCTTTGTCAACCGCTCTTGTAGGCCCGGCCGCGCCAGCCGACCCC   | 480 |
| <i>P. aurantiacobrunneum</i> | CTCGAGCGTATGGGGCTTTGTCAACCGCTCTTGTAGGCCCGGCCGCGCCAGCCGACCCC   | 480 |
| RAK16_fungus_ITS             | CTCAATCTATTTTTT                                               | 495 |
| <i>P. aurantiacobrunneum</i> | CTCAATCTATTTTTT                                               | 495 |

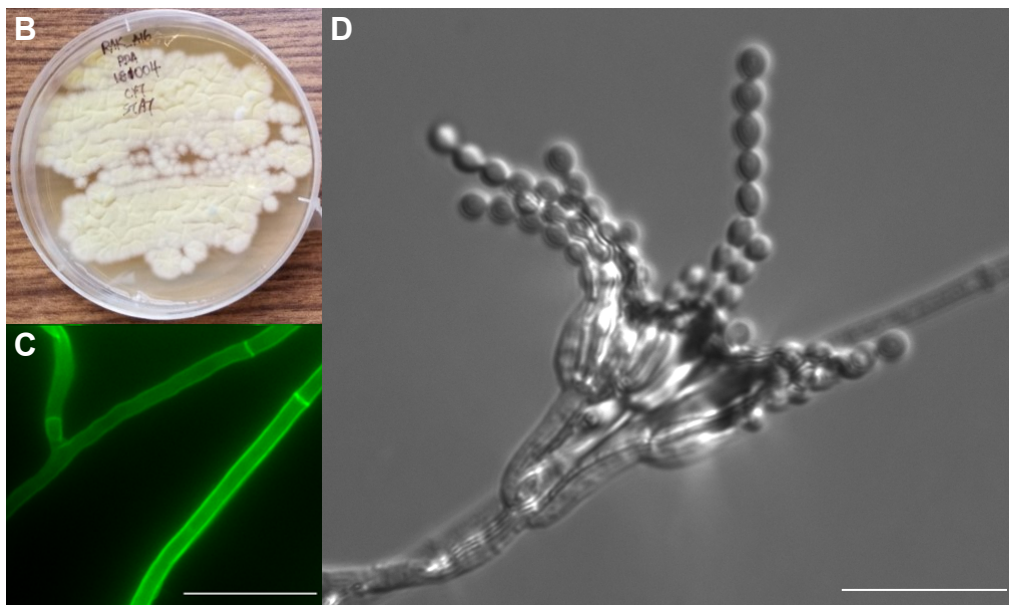

**Supplemental Information: Identification of the lichen-associated fungus as *Penicillium aurantiacobrunneum*.** (A) Alignment of the ITS rRNA region (ITS1 + 5.8S + ITS2) of the RAK16 isolate with the *P. aurantiacobrunneum* ITS region (Genbank accession MF281340), showing 100% identity. (B) The RAK16 isolate grown on potatoe dextrose agar (PDA) showing mold characteristics. (C-D) Microscopic images of the septate hyphae (C; visualized by staining with the fluorescent cell wall-binding dye Uvitex) and conidiophore (D; visualized by differential interference contrast (DIC) microscopy) of the RAK16 isolate consistent with vegetative and reproductive structures of *Penicillium* spp. Scalebar in micrographs represent 5  $\mu$ m.
